# Supplementary material
Source: MDPI journal article supplement (https://www.mdpi.com/2073-4433/12/12/1592)
Supplement: s1 [file s1]

# Seasonal and Spatial Variation of volatile organic compounds in ambient air of Almaty city, Kazakhstan

Olga P. Ibragimova<sup>1</sup>, Anara Omarova<sup>1</sup>, Bauyrzhan Bukenov<sup>1</sup>, Aray Zhakupbekova<sup>1</sup> and Nassiba Baimatova<sup>1,\*</sup>

<sup>1</sup> Center of Physical-Chemical Methods of Research and Analysis, al-Farabi Kazakh National University, Almaty, Kazakhstan

\* Correspondence: e-mail [baimatova@cfhma.kz](mailto:baimatova@cfhma.kz); Tel.: +7 727 2921374; Fax: +7 727 2923731

**Table S1.** Coordinates of Kazhydromet and PM<sub>2.5</sub> sampling sites.

| “Kazhydromet” stations     |                                   |                                     |                             |
|----------------------------|-----------------------------------|-------------------------------------|-----------------------------|
| No.                        | Coordinates                       | Crossroad                           | Closest VOCs sampling sites |
| PNZ 31                     | N43°10' 48.5574" E76°53' 22.5348" | Al-Farabi av.                       | S1                          |
| PNZ 1                      | N43°14' 16.6128" E76°56' 0.3048"  | Amangeldy str. – Satpaeva str.      | S2                          |
| PNZ 12                     | N43°16' 9.9618" E76°56' 3.4044"   | Raiymbek av. - Nauryzbay batur str. | S3                          |
| PNZ 26                     | N43° 15' 1.047" E76°52' 31.8858"  | Tole bi str. – Brusilovsky str.     | S5, S6                      |
| PM <sub>2.5</sub> stations |                                   |                                     |                             |
| 6                          | N 43°12'50.2" E76°53'35.2"        | Rozybakieva str. – Baikadamova str. | S1                          |
| 2                          | N 43°13'26.0" E76°56'17.2"        | Al-Farabi av. – Markova str.        | S2                          |
| 108                        | N 43°18'43.5" E77°00'03.8"        | Zhana Kairat microdistrict          | S4                          |
| 5                          | N 43°15'09.8" E76°54'40.6"        | Tole bi str. – Baizakova str.       | S6                          |

**Table S2.** Air sampling periods and meteorological parameters.

| Date       | Time    | Temperature, °C | Humidity, % | Wind speed, m/s | Precipitation, mm | Pressure, mm Hg |
|------------|---------|-----------------|-------------|-----------------|-------------------|-----------------|
| 01/15/2020 | 9:00 AM | -6.7            | 91          | 0               | 0                 | 774.3           |
|            | 9:00 PM | -1.9            | 72          | 0               | 0                 | 775.6           |
| 01/17/2020 | 9:00 AM | -9.7            | 88          | 1               | 0                 | 782.2           |
|            | 9:00 PM | -6.2            | 87          | 0               | 0                 | 780.0           |
| 01/19/2020 | 9:00 AM | -9.1            | 80          | 0               | 0                 | 769.1           |
|            | 9:00 PM | -0.5            | 52          | 1               | 0                 | 767.2           |
| 04/03/2020 | 9:00 AM | 9.3             | 90          | 0               | 1                 | 766.8           |
|            | 9:00 PM | 11.0            | 81          | 1               | 0                 | 766.4           |
| 04/05/2020 | 9:00 AM | 15.4            | 30          | 0               | 0                 | 762.5           |
|            | 9:00 PM | 17.0            | 36          | 1               | 0                 | 762.1           |
| 04/07/2020 | 9:00 AM | 13.7            | 55          | 0               | 0                 | 760.5           |
|            | 9:00 PM | 17.4            | 47          | 0               | 0                 | 761.8           |
| 04/28/2020 | 9:00 AM | 22.4            | 49          | 0               | 0                 | 752.7           |
|            | 9:00 PM | 24.6            | 43          | 0               | 0                 | 754.9           |
| 04/30/2020 | 9:00 AM | 13.2            | 94          | 1               | 3                 | 765.7           |
|            | 9:00 PM | 14.0            | 79          | 0               | 2                 | 767.3           |
| 05/03/2020 | 9:00 AM | 18.0            | 57          | 0               | 0                 | 756.6           |
|            | 9:00 PM | 13.1            | 91          | 1               | 6                 | 762.4           |
| 07/22/2020 | 9:00 AM | 25.2            | 36          | 1               | 0                 | 752.3           |
|            | 9:00 PM | 22.6            | 44          | 1               | 0.3               | 756.7           |
| 07/24/2020 | 9:00 AM | 29.0            | 39          | 0               | 0                 | 751.0           |
|            | 9:00 PM | 19.2            | 78          | 5               | 2                 | 761.4           |
| 07/26/2020 | 9:00 AM | 26.8            | 40          | 1               | 0                 | 755.8           |
|            | 9:00 PM | 22.9            | 65          | 1               | 0.3               | 757.0           |
| 10/21/2020 | 9:00 AM | 17.7            | 21          | 0               | 0                 | 761.3           |
|            | 9:00 PM | 14.5            | 30          | 0               | 0                 | 763.9           |
| 10/23/2020 | 9:00 AM | 6.2             | 79          | 0               | 0                 | 766.2           |
|            | 9:00 PM | 5.1             | 90          | 1               | 4                 | 771.7           |
| 10/25/2020 | 9:00 AM | 4.3             | 69          | 0               | 0                 | 773.4           |
|            | 9:00 PM | 7.9             | 50          | 0               | 0                 | 772.6           |

**Table S3.** Pearson correlation between the concentration of pollutants and meteorological parameters..

| No. | Compounds                     | Correlation coefficients |         |         |         |         |         |         |         |          |         |          |         |          |          |         |          |          |          |
|-----|-------------------------------|--------------------------|---------|---------|---------|---------|---------|---------|---------|----------|---------|----------|---------|----------|----------|---------|----------|----------|----------|
|     |                               | 1                        | 2       | 3       | 4       | 5       | 6       | 7       | 8       | 9        | 10      | 11       | 12      | 13       | 14       | 15      | 16       | 17       | 18       |
| 1   | Benzene                       | 1.0***                   | 0.5***  | 0.0     | 0.08    | 0.15    | 0.43*** | 0.16    | 0.08    | 0.46***  | 0.05    | -0.44*** | 0.28    | 0.65***  | 0.43**   | 0.43*   | 0.64***  | 0.61***  | 0.69***  |
| 2   | Toluene                       | 0.5***                   | 1.0***  | 0.54*** | 0.49*** | 0.61*** | 0.64*** | 0.51*** | 0.43**  | -0.02    | 0.44*** | 0.12     | 0.5***  | 0.25     | -0.26    | 0.51*** | 0.07     | -0.01    | 0.05     |
| 3   | Ethylbenzene                  | 0.0                      | 0.54*** | 1.0***  | 0.89*** | 0.95*** | 0.7***  | 0.68*** | 0.4**   | 0.11     | 0.34*   | 0.67***  | 0.58*** | 0.27     | -0.04    | 0.39    | -0.11    | -0.21    | -0.01    |
| 4   | <i>m</i> -Xylene              | 0.08                     | 0.49*** | 0.89*** | 1.0***  | 0.91*** | 0.81*** | 0.76*** | 0.72*** | 0.29     | 0.57*** | 0.53***  | 0.41*** | 0.51***  | 0.07     | 0.29    | 0.01     | -0.07    | 0.19     |
| 5   | <i>p</i> -Xylene              |                          |         |         |         |         |         |         |         |          |         |          |         |          |          |         |          |          |          |
| 6   | <i>o</i> -Xylene              | 0.15                     | 0.61*** | 0.95*** | 0.91*** | 1.0***  | 0.76*** | 0.69*** | 0.48*** | 0.19     | 0.35**  | 0.53***  | 0.57*** | 0.39***  | -0.0     | 0.4     | 0.01     | -0.12    | 0.1      |
| 7   | 1,2,4-Trimethylbenzene        | 0.43***                  | 0.64*** | 0.7***  | 0.81*** | 0.76*** | 1.0***  | 0.76*** | 0.64*** | 0.41***  | 0.54*** | 0.23     | 0.64*** | 0.76***  | 0.12     | 0.36    | 0.13     | 0.13     | 0.38     |
| 8   | 1,3,5-Trimethylbenzene        | 0.16                     | 0.51*** | 0.68*** | 0.76*** | 0.69*** | 0.76*** | 1.0***  | 0.63*** | 0.26     | 0.54*** | 0.4***   | 0.29    | 0.51***  | 0.04     | 0.2     | 0.02     | 0.01     | 0.19     |
| 9   | Propylbenzene                 | 0.08                     | 0.43**  | 0.4**   | 0.72*** | 0.48*** | 0.64*** | 0.63*** | 1.0***  | 0.08     | 0.95*** | 0.24     | -0.06   | 0.46***  | -0.1     | 0.1     | -0.04    | -0.02    | 0.13     |
| 10  | Phenol                        | 0.46***                  | -0.02   | 0.11    | 0.29    | 0.19    | 0.41*** | 0.26    | 0.08    | 1.0***   | 0.06    | -0.1     | 0.31    | 0.75***  | 0.64***  | 0.0     | 0.41***  | 0.53***  | 0.67***  |
| 11  | Chlorobenzene                 | 0.05                     | 0.44*** | 0.34*   | 0.57*** | 0.35**  | 0.54*** | 0.54*** | 0.95*** | 0.06     | 1.0***  | 0.31     | -0.08   | 0.38**   | -0.16    | 0.07    | -0.07    | -0.03    | 0.09     |
| 12  | Benzaldehyde                  | -0.44***                 | 0.12    | 0.67*** | 0.53*** | 0.53*** | 0.23    | 0.4***  | 0.24    | -0.1     | 0.31    | 1.0***   | 0.19    | -0.13    | -0.17    | 0.13    | -0.34*   | -0.43*** | -0.32    |
| 13  | 3-Picoline                    | 0.28                     | 0.5***  | 0.58*** | 0.41*** | 0.57*** | 0.64*** | 0.29    | -0.06   | 0.31     | -0.08   | 0.19     | 1.0***  | 0.44***  | 0.28     | 0.54**  | 0.12     | -0.35*   | 0.11     |
| 14  | Naphthalene                   | 0.65***                  | 0.25    | 0.27    | 0.51*** | 0.39*** | 0.76*** | 0.51*** | 0.46*** | 0.75***  | 0.38**  | -0.13    | 0.44*** | 1.0***   | 0.61***  | 0.17    | 0.47***  | 0.56***  | 0.71***  |
| 15  | Fluorene                      | 0.43**                   | -0.26   | -0.04   | 0.07    | -0.0    | 0.12    | 0.04    | -0.1    | 0.64***  | -0.16   | -0.17    | 0.28    | 0.61***  | 1.0***   | -0.09   | 0.58***  | 0.58***  | 0.42     |
| 16  | 1,2-Dichloroethane            | 0.43*                    | 0.51*** | 0.39    | 0.29    | 0.4     | 0.36    | 0.2     | 0.1     | 0.0      | 0.07    | 0.13     | 0.54**  | 0.17     | -0.09    | 1.0***  | -0.12    | -0.18    | -0.02    |
| 17  | Methylene chloride            | 0.64***                  | 0.07    | -0.11   | 0.01    | 0.01    | 0.13    | 0.02    | -0.04   | 0.41***  | -0.07   | -0.34*   | 0.12    | 0.47***  | 0.58***  | -0.12   | 1.0***   | 0.66***  | 0.48**   |
| 18  | <i>n</i> -Decane              | 0.61***                  | -0.01   | -0.21   | -0.07   | -0.12   | 0.13    | 0.01    | -0.02   | 0.53***  | -0.03   | -0.43*** | -0.35*  | 0.56***  | 0.58***  | -0.18   | 0.66***  | 1.0***   | 0.7***   |
| 19  | <i>n</i> -Heptane             | 0.69***                  | 0.05    | -0.01   | 0.19    | 0.1     | 0.38    | 0.19    | 0.13    | 0.67***  | 0.09    | -0.32    | 0.11    | 0.71***  | 0.42     | -0.02   | 0.48**   | 0.7***   | 1.0***   |
| 20  | CO                            | 0.38                     | 0.35    | 0.35    | 0.39    | 0.47*   | 0.75*** | 0.29    | -0.09   | 0.48**   | -0.07   | -0.08    | 0.62*** | 0.6***   | 0.52     | -0.35   | 0.22     | 0.18     | 0.3      |
| 21  | SO <sub>2</sub>               | 0.55***                  | -0.08   | 0.04    | 0.11    | 0.08    | 0.38    | 0.07    | -0.32   | 0.54***  | -0.21   | -0.26    | 0.08    | 0.61***  | 0.54     | -0.25   | 0.61***  | 0.61***  | 0.56     |
| 22  | NO <sub>2</sub>               | 0.24                     | 0.15    | 0.06    | 0.08    | 0.2     | 0.15    | 0.0     | -0.18   | 0.08     | -0.03   | -0.13    | 0.19    | 0.14     | -0.01    | 0.09    | 0.28     | 0.21     | -0.09    |
| 23  | PM <sub>2.5</sub>             | 0.62***                  | 0.02    | -0.01   | 0.09    | 0.08    | 0.31    | 0.15    | -0.05   | 0.57***  | -0.07   | -0.41*   | 0.68*** | 0.64***  | 0.73***  | 0.08    | 0.59***  | 0.8***   | 0.65***  |
| 24  | Temperature, °C               | -0.55***                 | 0.08    | 0.27    | 0.11    | 0.17    | -0.27   | 0.04    | 0.04    | -0.51*** | 0.08    | 0.59***  | -0.36*  | -0.63*** | -0.55*** | 0.01    | -0.51*** | -0.57*** | -0.56*** |
| 25  | Humidity, %                   | 0.01                     | -0.31*  | -0.28   | -0.08   | -0.21   | 0.02    | -0.06   | 0.11    | 0.27     | 0.07    | -0.32*   | -0.2    | 0.28     | 0.19     | -0.1    | 0.05     | 0.2      | 0.35     |
| 26  | Wind speed, m s <sup>-1</sup> | -0.24                    | -0.2    | 0.12    | 0.23    | 0.18    | -0.19   | -0.03   | 0.04    | 0.03     | -0.08   | 0.18     | -0.28   | -0.15    | 0.08     | -0.08   | 0.06     | -0.08    | 0.02     |
| 27  | Precipitation, mm             | -0.44***                 | -0.21   | -0.09   | -0.1    | -0.14   | -0.22   | -0.13   | -0.03   | -0.24    | 0.01    | 0.1      | -0.15   | -0.32*   | -0.23    | -0.09   | -0.37**  | -0.36**  | -0.24    |
| 28  | Pressure, mm Hg               | 0.5***                   | 0.02    | -0.19   | -0.05   | -0.09   | 0.31*   | -0.03   | -0.03   | 0.51***  | -0.08   | -0.55*** | 0.41*** | 0.57***  | 0.34     | 0.11    | 0.33     | 0.38**   | 0.54***  |

Statistically significant:

\*\*\*p&lt;0.01

\*\*p&lt;0.05

\*p&lt;0.1

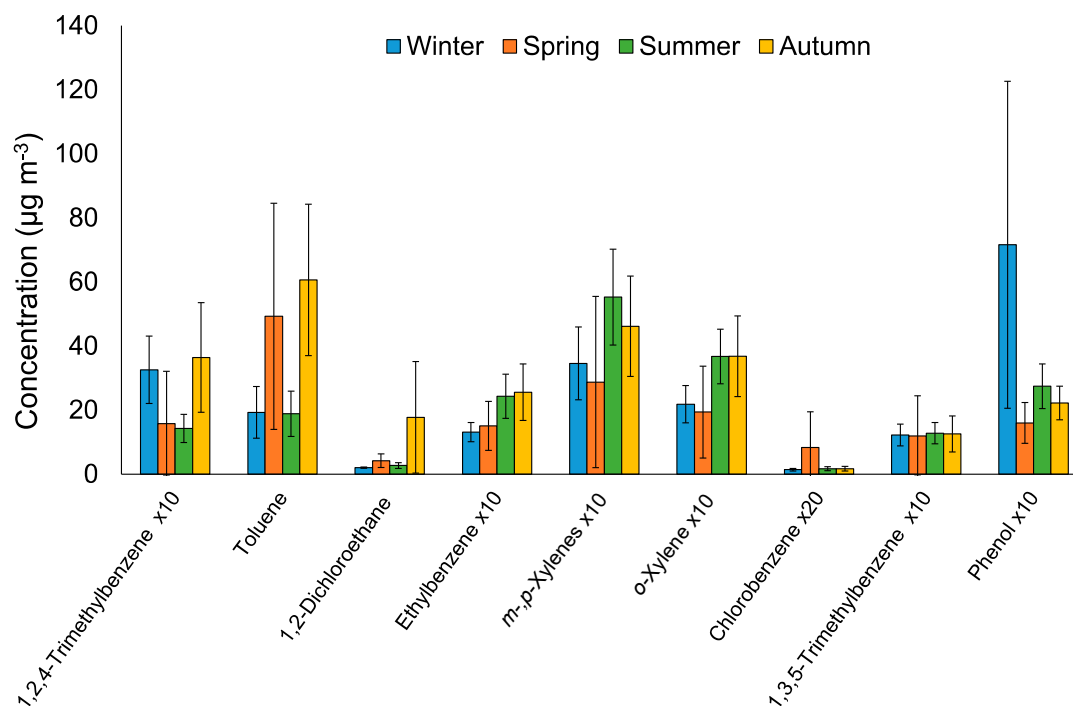

Figure S1. Seasonal variations of the mean VOCs concentrations (mean of the sampling days in each season  $\pm$  SD).

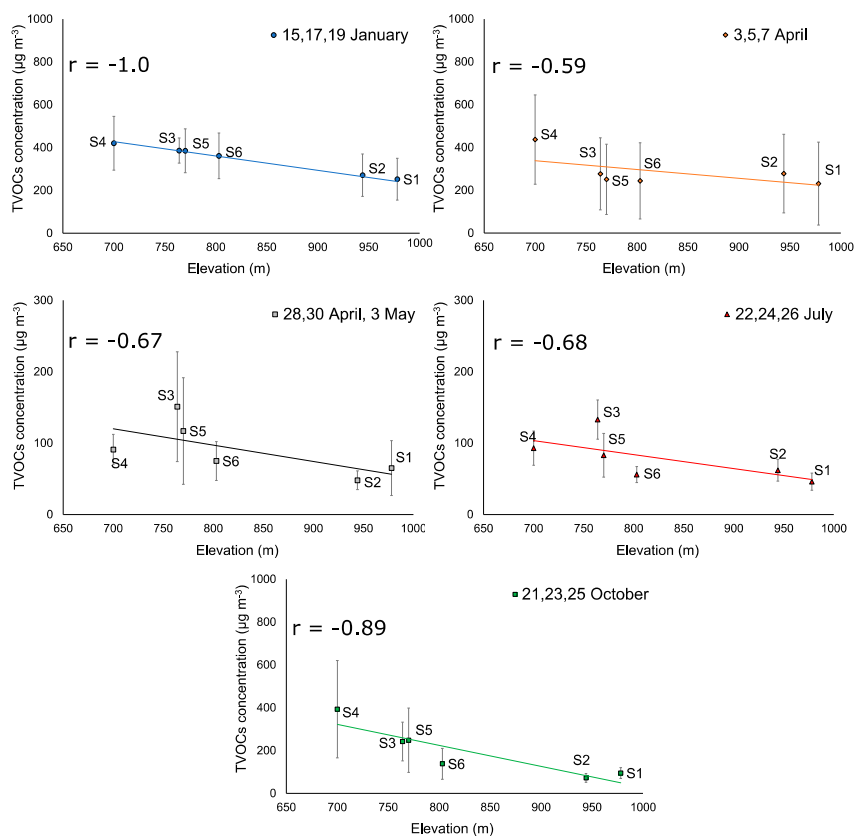

Figure S2. TVOCs concentrations and sampling site's (S1-S6) elevation above the sea level during sampling periods.
